# Supplementary material for: High performance of catalysts supported by directly grown PTFE-free micro-porous CNT layer in a proton exchange membrane fuel cell
Source: Royal Society of Chemistry journal article supplement (doi:10.1039/c0jm03215h), 2011-01-01
Supplement: c0jm03215h.pdf [file c0jm03215h.pdf]

# High performance of catalysts supported by directly grown PTFE-free micro-porous CNT layer in proton exchange membrane fuel cell

He-Yun Du,<sup>a</sup> Chen-Hao Wang,<sup>b,\*</sup> Hsin-Cheng Hsu,<sup>c</sup> Sun-Tang Chang,<sup>c</sup> Shi-Chern Yen,<sup>a</sup> Li-Chyong Chen,<sup>c</sup> Balasubramanian Viswanathan,<sup>d</sup> and Kuei-Hsien Chen,<sup>c,eb</sup>

<sup>5</sup> Received (in XXX, XXX) Xth XXXXXXXXXX 200X, Accepted Xth XXXXXXXXXX 200X

First published on the web Xth XXXXXXXXXX 200X

DOI: 10.1039/b000000x

## Supplementary Information

### 10 Supporting experimental setup

#### Three-electrode fuel cell setup

In order to individually measure the cathode, we use three-electrode fuel cell (Asia Pacific Fuel Cell Technologies Ltd.), as shown in Fig. S1. A Pt disk was pressed on the membrane purged by H<sub>2</sub>, acting as the dynamic hydrogen electrode (DHE) and the reference electrode (RE); the anode was the counter electrode (CE) and the cathode was the working electrode (WE). The measurements were performed with a Solartron 1255B frequency response analyzer in a frequency range of 20 KHz to 50 mHz (10 points/decade) and dc bias was applied by an Solartron 1287 potentiostat/ galvanostat. An ac sinusoidal perturbation of 10 mV in amplitude was superimposed on a dc bias.

#### Measurement of electrochemical surface area

<sup>25</sup> To measure the electrochemical surface area (ECSA) of the cathode, the cyclic voltammetry (CV) curves of single cell condition were measured with N<sub>2</sub> instead of O<sub>2</sub>/air at the cathode side.<sup>1</sup> The ECSA was calculated by hydrogen adsorption/desorption peak areas as the following equation:

$$30 \text{ ECSA (cm}^2\text{)} = \frac{Q_H}{210 \times 10^{-6}}$$

### Supporting text and figures

The electrochemical impedance spectroscopy (EIS) is an effective technique to examine the mass transport of MEA, which is related to the water management of the gas diffusion <sup>35</sup> electrode.<sup>2,3</sup> Typical EIS spectra for Pt/MPL-CNT MEA were performed at the first polarization cycle and after 100 polarization cycles, showing the Nyquist plots in Figs. S2a and S2b, respectively, which indicates that the low-frequency relaxation process was mainly due to water flooding of the <sup>40</sup> cathode. The plots are fitted by the model proposed by Malevich *et al.*<sup>4</sup> The mass-transfer resistances (R<sub>mt</sub>) and the charge-transfer resistances (R<sub>ct</sub>) at each potential are demonstrated in Fig. S2c. Malevich *et al.* proposed the R<sub>mt</sub> corresponding to water/oxygen transport processes.<sup>4</sup> In this <sup>45</sup> work, it clearly demonstrates that the R<sub>mt</sub> at each potential is increased only slightly after 100 polarization cycles, indicating that Pt/MPL-CNT MEA maintains the wetting property after 100 polarization cycles.

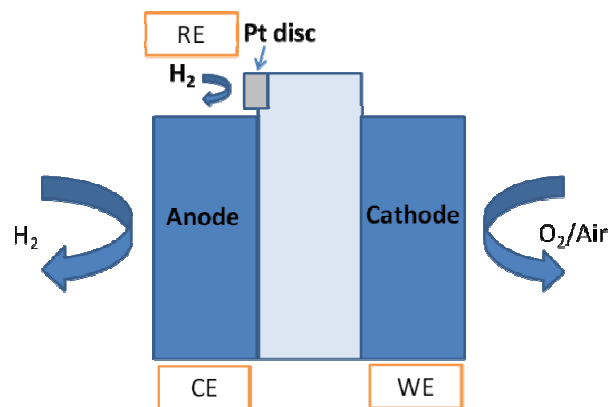

Fig. S1 The setup of three-electrode fuel cell.

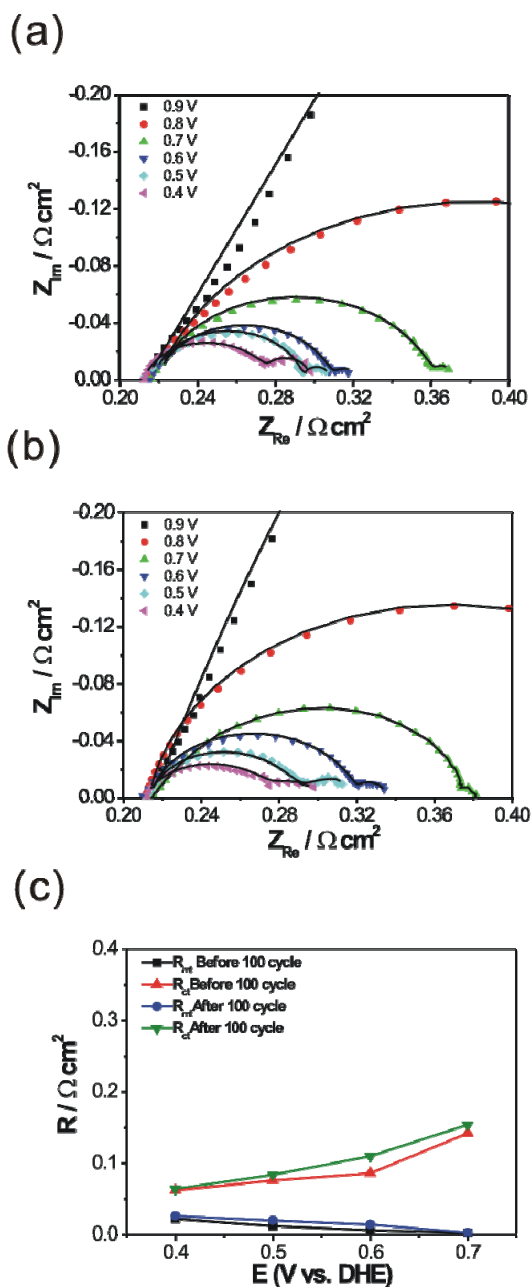

Fig. S2 The Nyquist plots for Pt/MPL-CNT MEA at (a) the first polarization curve and (b) after 100 polarization curves. (c)  $R_{mt}$  and  $R_{ct}$  at each potential.

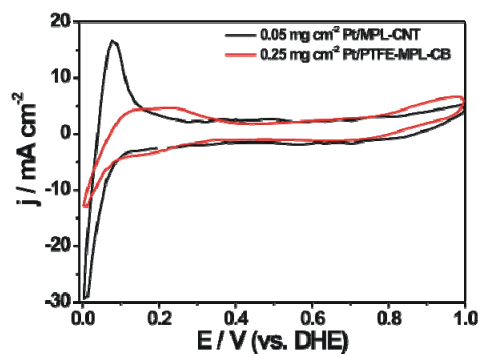

Fig. S3 The CV curves of Pt/MPL-CNT and Pt/PTFE-MPL-CB with scan rate of  $50 mV s^{-1}$ . Anode:  $H_2$  and cathode:  $N_2$ .

## References

1. Z. Q. Tian, X. L. Wang, H. M. Zhang, B. L. Yi and S. P. Jiang, *Electrochem. Commun.*, 2006, **8**, 1158-1162.
2. T. J. P. Freire and E. R. Gonzalez, *J. Electroanal. Chem.*, 2001, **503**, 57-68.
3. S. L. A. da Silva and E. A. Ticianelli, *J. Electroanal. Chem.*, 1995, **391**, 101-109.
4. D. Malevich, E. Halliop, B. A. Peppley, J. G. Pharoah and K. Karan, *J. Electrochem. Soc.*, 2009, **156**, 216-224.
